# Supplementary material
Source: PubMed Central journal article supplement (PMC8088339)
Supplement: NIHMS1692601-supplement-supplementary_material_1.pdf [file NIHMS1692601-supplement-supplementary_material_1.pdf]

**Figure S1. Validation of knockdown efficiency.** A) The expression levels of LINC00449 and LINC01270 in MDA-MB-231 cells were measured by standard qRT-PCR and shown as the mean Ct values from two independent experiments. GAPDH was used for reference. B) MDA-MB-231, transfected with the indicated siRNAs, were harvested after 48 hours for qPCR analysis to assess knockdown efficiency. The fold change of each lincRNA was compared with negative control (NC) siRNA transfected group. Data were expressed as mean  $\pm$  SD. P-values were determined by one-way ANOVA followed by Dunnett's multiple comparisons test: \*\* P-value < 0.01.

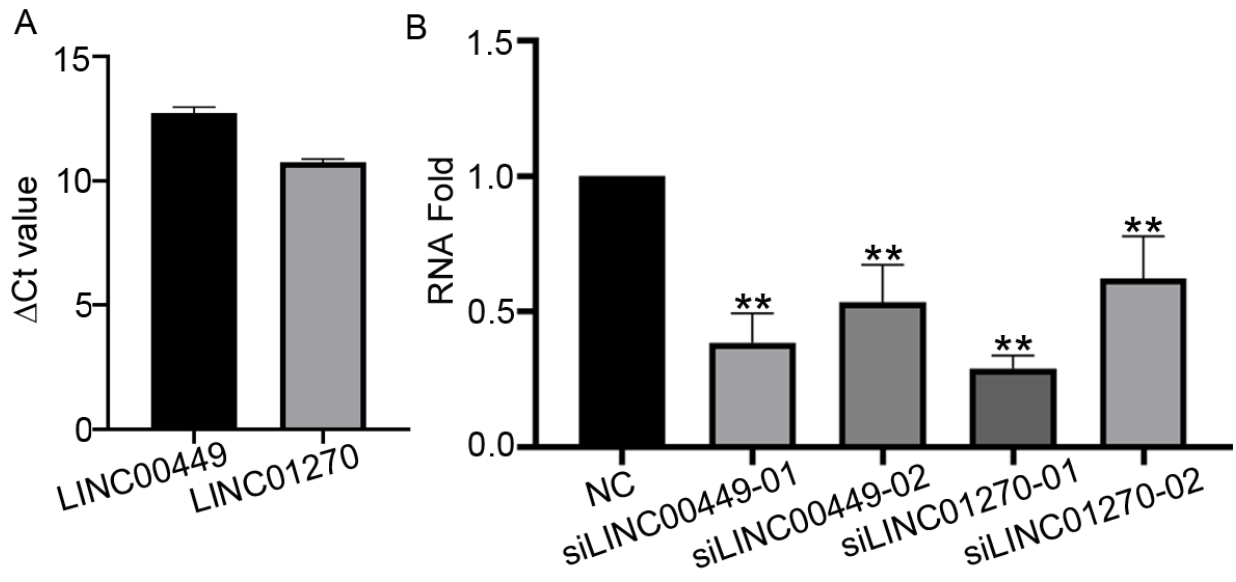

**Supplementary Table 1. Primer sequences.**

| <b>Gene Name</b> | <b>Sequence (5'-3')</b>                             |
|------------------|-----------------------------------------------------|
| LINC00449        | F: GCATTCTTGCATTGGGCAGT<br>R: TGAGCTCTCAGGTATGCTCG  |
| LINC01270        | F: AGCACCAGTTAGCCCAGATG<br>R: CACATTCCTGCGCTTTCGTG  |
| GAPDH            | F: TCCTGTTGACAGTCAGCCGCA<br>R: ACCAGGCGCCAATACGACCA |

**Supplementary Table 2. siRNA target sequences.**

| <b>Name</b>  | <b>Sense sequence (5'-3')</b> | <b>Antisense sequence (5'-3')</b> | <b>Assay IDs</b> |
|--------------|-------------------------------|-----------------------------------|------------------|
| LINC00449-01 | GGAAA AUGGGAGUAGGAUATT        | UAUCCUACUCCCAUUUCCTT              | n486205          |
| LINC00449-02 | GCAUCUUCACGGACAAUUUTT         | AAAUUGUCCGUGAAGAUGCCT             | n503412          |
| LINC01270-01 | GAGCUGAGCUUAAGAGUUATT         | UAACUCUUAAGCUCAGCUCCC             | n503493          |
| LINC01270-02 | CCACGAUCCCGACUUGUAUTT         | AUACAAGUCGGGAUCGUGGTG             | n503492          |

**Supplementary Table 3.** 25 lincRNAs significantly associated with overall survival in both SBCSS and SCCS.

| ENSEMBL ID      | Gene Symbol | SBCSS            |         | SCCS             |         | Meta-Analysis |         |
|-----------------|-------------|------------------|---------|------------------|---------|---------------|---------|
|                 |             | HR               | P Value | HR               | P Value | Q Stat        | P Value |
| ENSG00000175773 | ZBTB44-DT   | 1.94 (1.3 - 3)   | 0.003   | 2.18 (1.1 - 4.4) | 0.028   | 0.786         | <0.001  |
| ENSG00000180712 | LINC02363   | 1.42 (1 - 2)     | 0.050   | 2.77 (1.1 - 7.1) | 0.034   | 0.193         | 0.010   |
| ENSG00000203441 | LINC00449   | 1.55 (1.2 - 2.1) | 0.004   | 2.65 (1.3 - 5.4) | 0.008   | 0.181         | <0.001  |
| ENSG00000203999 | LINC01270   | 1.55 (1 - 2.4)   | 0.041   | 2.41 (1.2 - 5)   | 0.017   | 0.305         | 0.003   |
| ENSG00000225511 | LINC00475   | 1.32 (1 - 1.7)   | 0.038   | 2.32 (1.1 - 5)   | 0.031   | 0.175         | 0.008   |
| ENSG00000227082 | LINC02798   | 1.64 (1.1 - 2.4) | 0.009   | 4.23 (1.1 - 16)  | 0.034   | 0.181         | 0.002   |
| ENSG00000227544 |             | 1.53 (1.1 - 2.1) | 0.010   | 2.57 (1 - 6.6)   | 0.050   | 0.306         | 0.002   |
| ENSG00000227588 | CNTN4-AS2   | 1.20 (1 - 1.4)   | 0.037   | 1.45 (1 - 2)     | 0.027   | 0.325         | 0.004   |
| ENSG00000228308 | LINC01209   | 1.68 (1.3 - 2.2) | <0.001  | 2.01 (1.1 - 3.5) | 0.015   | 0.572         | <0.001  |
| ENSG00000228889 | UBAC2-AS1   | 1.44 (1.1 - 1.9) | 0.015   | 2.19 (1.2 - 4.1) | 0.013   | 0.232         | 0.001   |
| ENSG00000230523 | LINC01756   | 1.47 (1 - 2.1)   | 0.039   | 2.32 (1.1 - 4.7) | 0.020   | 0.259         | 0.004   |
| ENSG00000231595 |             | 1.55 (1.1 - 2.2) | 0.018   | 3.09 (1.3 - 7.4) | 0.012   | 0.155         | 0.002   |
| ENSG00000232458 | LINC01450   | 1.42 (1.1 - 1.9) | 0.017   | 1.96 (1.1 - 3.4) | 0.016   | 0.302         | 0.001   |
| ENSG00000236423 | LINC01134   | 1.54 (1.1 - 2.1) | 0.004   | 2.03 (1 - 4.1)   | 0.047   | 0.475         | 0.001   |
| ENSG00000244733 |             | 1.44 (1 - 2)     | 0.030   | 2.69 (1.1 - 6.6) | 0.029   | 0.194         | 0.005   |
| ENSG00000250899 |             | 1.29 (1 - 1.6)   | 0.028   | 1.93 (1.1 - 3.5) | 0.033   | 0.224         | 0.005   |
| ENSG00000258561 |             | 1.68 (1.1 - 2.5) | 0.014   | 2.08 (1.1 - 3.8) | 0.016   | 0.568         | 0.001   |
| ENSG00000261334 |             | 1.51 (1.1 - 2.2) | 0.025   | 3.52 (1.1 - 11)  | 0.030   | 0.163         | 0.005   |
| ENSG00000266278 | LINC01910   | 1.48 (1 - 2.1)   | 0.031   | 2.36 (1 - 5.3)   | 0.038   | 0.303         | 0.005   |
| ENSG00000266821 |             | 1.57 (1.2 - 2.1) | 0.004   | 5.21 (1.2 - 22)  | 0.025   | 0.112         | 0.001   |
| ENSG00000270069 | MIR222HG    | 1.33 (1 - 1.8)   | 0.040   | 2.20 (1.3 - 3.9) | 0.006   | 0.117         | 0.002   |
| ENSG00000271417 |             | 1.79 (1.3 - 2.5) | 0.000   | 2.70 (1.1 - 6.5) | 0.028   | 0.389         | <0.001  |
| ENSG00000271743 |             | 1.39 (1.1 - 1.8) | 0.012   | 2.07 (1 - 4.2)   | 0.043   | 0.299         | 0.002   |
| ENSG00000273374 |             | 1.68 (1.2 - 2.4) | 0.004   | 2.39 (1.2 - 4.6) | 0.009   | 0.351         | <0.001  |
| ENSG00000279978 |             | 1.43 (1.1 - 1.8) | 0.005   | 2.41 (1.1 - 5.2) | 0.026   | 0.207         | 0.001   |

**Supplementary Table 4.** 61 lincRNAs had a significant association with disease-free survival ( $P < 0.05$ ) in SBCSS and were significantly higher expressed in tumor tissues compared with adjacent normal tissues in TCGA data ( $\log_2(\text{Fold Change}) > 0.5$  and  $\text{FDR} < 0.05$ ).

| ENSEMBL ID      | Gene Symbol | SBCSS              |         | Diff Exp (Tumor Vs Normal)   |        |
|-----------------|-------------|--------------------|---------|------------------------------|--------|
|                 |             | HR                 | P Value | $\log_2(\text{Fold-Change})$ | FDR    |
| ENSG00000145063 |             | 1.38 (1.1 - 1.7)   | 0.002   | 2.56                         | <0.001 |
| ENSG00000177234 | LINC01561   | 1.68 (1.1 - 2.5)   | 0.014   | 4.87                         | <0.001 |
| ENSG00000179066 |             | 1.24 (1 - 1.5)     | 0.033   | 1.68                         | <0.001 |
| ENSG00000196979 | GPRACR      | 1.68 (1.2 - 2.5)   | 0.007   | 1.25                         | <0.001 |
| ENSG00000197180 |             | 0.76 (0.59 - 0.98) | 0.036   | 0.85                         | <0.001 |
| ENSG00000198468 | FLVCR1-DT   | 1.46 (1.1 - 2)     | 0.013   | 0.67                         | <0.001 |
| ENSG00000203441 | LINC00449   | 1.63 (1.2 - 2.2)   | 0.002   | 0.52                         | <0.001 |
| ENSG00000203999 | LINC01270   | 1.59 (1.1 - 2.4)   | 0.026   | 0.75                         | <0.001 |
| ENSG00000214900 | LINC01588   | 1.51 (1.2 - 2)     | 0.003   | 1.48                         | <0.001 |
| ENSG00000226091 | LINC00937   | 1.41 (1.1 - 1.9)   | 0.017   | 0.69                         | <0.001 |
| ENSG00000226137 | BAIAP2-DT   | 0.67 (0.5 - 0.92)  | 0.012   | 0.50                         | <0.001 |
| ENSG00000227036 | LINC00511   | 1.50 (1.2 - 1.9)   | 0.000   | 2.93                         | <0.001 |
| ENSG00000227533 | SLC2A1-AS1  | 1.43 (1.1 - 1.9)   | 0.008   | 0.54                         | <0.001 |
| ENSG00000228421 |             | 0.76 (0.59 - 0.97) | 0.027   | 0.70                         | <0.001 |
| ENSG00000232679 | LINC01705   | 1.25 (1.1 - 1.5)   | 0.009   | 5.76                         | <0.001 |
| ENSG00000234571 | H2BP2       | 1.68 (1.1 - 2.6)   | 0.016   | 0.96                         | <0.001 |
| ENSG00000235142 | LINC02532   | 1.21 (1 - 1.4)     | 0.041   | 2.16                         | <0.001 |
| ENSG00000235244 | DANT2       | 1.21 (1 - 1.4)     | 0.044   | 0.70                         | <0.001 |
| ENSG00000235295 | LINC01634   | 1.66 (1.1 - 2.4)   | 0.011   | 1.04                         | 0.001  |
| ENSG00000247373 | TMED2-DT    | 1.41 (1 - 1.9)     | 0.028   | 0.67                         | <0.001 |
| ENSG00000247624 | CPEB2-DT    | 1.58 (1 - 2.5)     | 0.048   | 0.89                         | <0.001 |
| ENSG00000249267 | LINC00939   | 1.39 (1 - 1.9)     | 0.050   | 0.69                         | 0.001  |
| ENSG00000249859 | PVT1        | 1.30 (1 - 1.7)     | 0.043   | 1.47                         | <0.001 |
| ENSG00000251161 |             | 1.38 (1 - 1.8)     | 0.030   | 0.50                         | <0.001 |
| ENSG00000251442 | LINC01094   | 1.39 (1 - 1.9)     | 0.030   | 1.19                         | <0.001 |
| ENSG00000251538 | LINC02201   | 2.00 (1.3 - 3.1)   | 0.001   | 2.80                         | <0.001 |
| ENSG00000253490 | LINC02099   | 1.80 (1.2 - 2.6)   | 0.002   | 2.41                         | <0.001 |
| ENSG00000255345 |             | 1.36 (1 - 1.8)     | 0.033   | 3.01                         | <0.001 |
| ENSG00000258414 |             | 1.27 (1 - 1.6)     | 0.033   | 0.99                         | <0.001 |
| ENSG00000258910 | LINC01956   | 1.15 (1 - 1.3)     | 0.043   | 2.85                         | <0.001 |
| ENSG00000259656 |             | 1.23 (1 - 1.5)     | 0.047   | 0.51                         | 0.001  |
| ENSG00000260710 |             | 0.84 (0.71 - 0.99) | 0.034   | 2.37                         | <0.001 |
| ENSG00000260778 |             | 0.76 (0.61 - 0.95) | 0.014   | 0.83                         | <0.001 |

|                 |            |                    |       |      |        |
|-----------------|------------|--------------------|-------|------|--------|
| ENSG00000261526 |            | 0.71 (0.52 - 0.97) | 0.030 | 0.53 | <0.001 |
| ENSG00000261670 |            | 1.58 (1.1 - 2.2)   | 0.010 | 1.60 | <0.001 |
| ENSG00000262188 | LINC01978  | 1.35 (1.1 - 1.7)   | 0.009 | 2.12 | <0.001 |
| ENSG00000262877 |            | 0.82 (0.68 - 0.99) | 0.037 | 0.55 | 0.001  |
| ENSG00000263680 |            | 1.28 (1 - 1.6)     | 0.025 | 2.41 | <0.001 |
| ENSG00000263731 |            | 1.28 (1 - 1.6)     | 0.033 | 0.62 | <0.001 |
| ENSG00000267065 | LINC02080  | 1.65 (1.2 - 2.2)   | 0.001 | 0.54 | <0.001 |
| ENSG00000268621 | IGFL2-AS1  | 1.28 (1.1 - 1.5)   | 0.011 | 1.12 | <0.001 |
| ENSG00000269416 | LINC01224  | 1.52 (1 - 2.2)     | 0.031 | 3.71 | <0.001 |
| ENSG00000270124 |            | 0.76 (0.65 - 0.9)  | 0.001 | 1.03 | <0.001 |
| ENSG00000270673 | YTHDF3-AS1 | 1.28 (1.1 - 1.6)   | 0.013 | 1.07 | <0.001 |
| ENSG00000271119 |            | 0.73 (0.55 - 0.98) | 0.034 | 0.54 | <0.001 |
| ENSG00000271420 |            | 1.23 (1 - 1.5)     | 0.041 | 0.92 | <0.001 |
| ENSG00000272079 |            | 1.25 (1 - 1.5)     | 0.040 | 1.68 | <0.001 |
| ENSG00000272455 |            | 1.32 (1.1 - 1.6)   | 0.017 | 0.96 | <0.001 |
| ENSG00000272853 |            | 0.77 (0.59 - 1)    | 0.049 | 1.03 | <0.001 |
| ENSG00000273084 |            | 0.81 (0.67 - 0.98) | 0.033 | 0.66 | <0.001 |
| ENSG00000273449 |            | 1.28 (1 - 1.6)     | 0.022 | 0.83 | <0.001 |
| ENSG00000273576 |            | 0.83 (0.69 - 0.99) | 0.036 | 0.92 | <0.001 |
| ENSG00000273759 |            | 0.80 (0.65 - 0.99) | 0.044 | 0.95 | <0.001 |
| ENSG00000274367 |            | 1.37 (1.1 - 1.7)   | 0.004 | 2.20 | <0.001 |
| ENSG00000274605 | PCCA-DT    | 0.80 (0.67 - 0.96) | 0.013 | 0.62 | <0.001 |
| ENSG00000275236 |            | 1.39 (1.1 - 1.8)   | 0.018 | 0.88 | <0.001 |
| ENSG00000275897 |            | 1.27 (1 - 1.6)     | 0.021 | 0.72 | <0.001 |
| ENSG00000277022 |            | 1.30 (1 - 1.7)     | 0.036 | 2.21 | <0.001 |
| ENSG00000279078 | SND1-IT1   | 1.38 (1 - 1.8)     | 0.035 | 0.82 | <0.001 |
| ENSG00000281406 | BLACAT1    | 1.26 (1 - 1.5)     | 0.027 | 0.52 | 0.046  |
| ENSG00000281706 |            | 1.31 (1 - 1.7)     | 0.044 | 0.71 | <0.001 |
